# Supplementary material for: Effects of different information brochures on women’s decision-making regarding mammography screening: study protocol for a randomized controlled questionnaire study
Source: PubMed Central journal article supplement (PMC3851440; doi:10.1186/1745-6215-14-319), 2013-10-01
Supplement: 1745-6215-14-319-S1.pdf [file 1745-6215-14-319-S1.pdf]

HEINRICH HEINE  
UNIVERSITÄT DÜSSELDORF

ETHIKKOMMISSION der Medizinischen Fakultät

ETHIKKOMMISSION der Medizinischen Fakultät der Heinrich-Heine-Universität, Moorenstr. 5, 40225 Düsseldorf

Frau  
Dr. med. E. Gummersbach  
Institut für Allgemeinmedizin  
Geb. 14.97

HIER

*Prof. Dr. T. Hohlfeld*

Telefon: (0211)81-19590  
Sekretariat: (0211)81-19591  
Fax: (0211)81-19592  
[Ethikkommission@med.uni-duesseldorf.de](mailto:Ethikkommission@med.uni-duesseldorf.de)

22. Feb. 2012

Stets angeben:

**Studiennummer: 3797**

Sehr geehrte Frau Kollegin Gummersbach,

die Ethikkommission der Medizinischen Fakultät der Heinrich-Heine-Universität Düsseldorf hat das von Ihnen vorgelegte Studienprotokoll mit dem Titel:

**Welchen Einfluss haben Informationsbroschüren auf die Entscheidung der Frau am Mammographie-Screening teilzunehmen**

geprüft und beurteilt.

Von Seiten der Kommission bestehen keine ethischen oder rechtlichen Bedenken gegen die Durchführung der geplanten Studie.

Nach Abschluss des Projektes bitte ich um Übersendung eines knappen Schlussberichtes oder einer abschließenden Publikation.

Für die Durchführung der Studie wünschen wir viel Erfolg!

Mit freundlichen Grüßen

Prof. Dr. Klaus-Dietrich Kröncke  
i. A. der Kommission

**Rechtsmittelbelehrung:** Gegen diesen Bescheid kann innerhalb eines Monats nach Bekanntgabe Widerspruch erhoben werden. Der Widerspruch ist beim Dekan der Medizinischen Fakultät der Heinrich-Heine-Universität Düsseldorf schriftlich einzulegen.



HEINRICH HEINE  
UNIVERSITÄT DÜSSELDORF

ETHIKKOMMISSION der Medizinischen Fakultät

ETHIKKOMMISSION der Medizinischen Fakultät der Heinrich-Heine-Universität, Moorenstr. 5, 40225 Düsseldorf

Frau  
Dr. med. E. Gummersbach  
Institut für Allgemeinmedizin  
Geb. 14.97

HIER

*Prof. Dr. T. Hohlfeld*

Telefon: (0211)81-19590  
Sekretariat: (0211)81-19591  
Fax: (0211)81-19592  
[Ethikkommission@med.uni-duesseldorf.de](mailto:Ethikkommission@med.uni-duesseldorf.de)

22. Feb. 2012

Stets angeben:

**Studiennummer: 3797**

Sehr geehrte Frau Kollegin Gummersbach,

die Ethikkommission der Medizinischen Fakultät der Heinrich-Heine-Universität Düsseldorf hat das von Ihnen vorgelegte Studienprotokoll mit dem Titel:

**Welchen Einfluss haben Informationsbroschüren auf die Entscheidung der Frau am Mammographie-Screening teilzunehmen**

geprüft und beurteilt.

Von Seiten der Kommission bestehen keine ethischen oder rechtlichen Bedenken gegen die Durchführung der geplanten Studie.

Nach Abschluss des Projektes bitte ich um Übersendung eines knappen Schlussberichtes oder einer abschließenden Publikation.

Für die Durchführung der Studie wünschen wir viel Erfolg!

Mit freundlichen Grüßen



Prof. Dr. Klaus-Dietrich Kröncke  
i. A. der Kommission

**Rechtsmittelbelehrung:** Gegen diesen Bescheid kann innerhalb eines Monats nach Bekanntgabe Widerspruch erhoben werden. Der Widerspruch ist beim Dekan der Medizinischen Fakultät der Heinrich-Heine-Universität Düsseldorf schriftlich einzulegen.
